# Supplementary material for: NHR‐49/HNF4 integrates regulation of fatty acid metabolism with a protective transcriptional response to oxidative stress and fasting
Source: PubMed Central journal article supplement (PMC5946062; doi:10.1111/acel.12743), 2018-03-05
Supplement: ACEL-17-e12743-s001.pdf [file ACEL-17-e12743-s001.pdf]

A

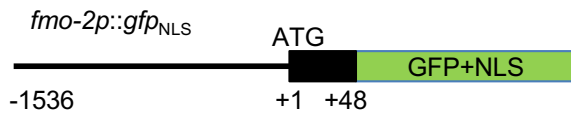

B

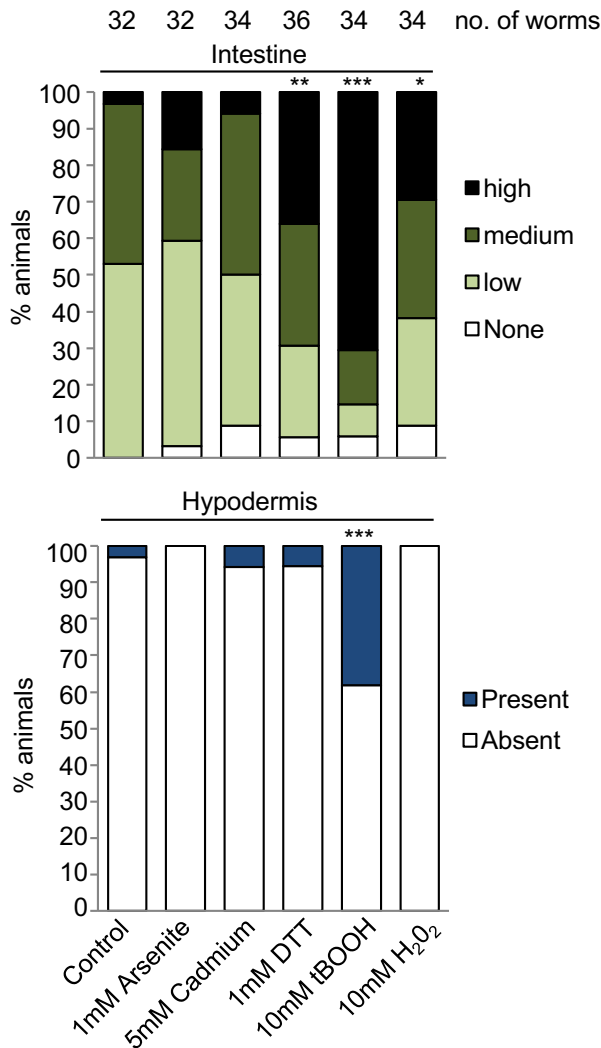

### Fig. S1. Transcriptional regulation of *fmo-2* in response to stress.

**[A]** Scheme of the *fmo-2p::gfp* reporter. The promoter includes 1.5kb upstream of the *fmo-2* open reading frame and the first 48bp downstream of the ATG. NLS=nuclear localization signal.

**[B]** Bar graphs show the quantification of intestinal and hypodermal fluorescence of *fmo-2p::gfp* in control animals or animals exposed for 180min to arsenite, cadmium, DTT, tBOOH or H<sub>2</sub>O<sub>2</sub> at the indicated concentrations. Quantification is based on the number of visible GFP-positive nuclei in each worm. Between 32 and 36 animals were scored for each group, as indicated. Statistically significant differences between control and treated animals are shown: \*= $p < 0.05$ , \*\*= $p < 0.005$ , and \*\*\*= $p < 0.0005$  (determined by Chi-squared test).

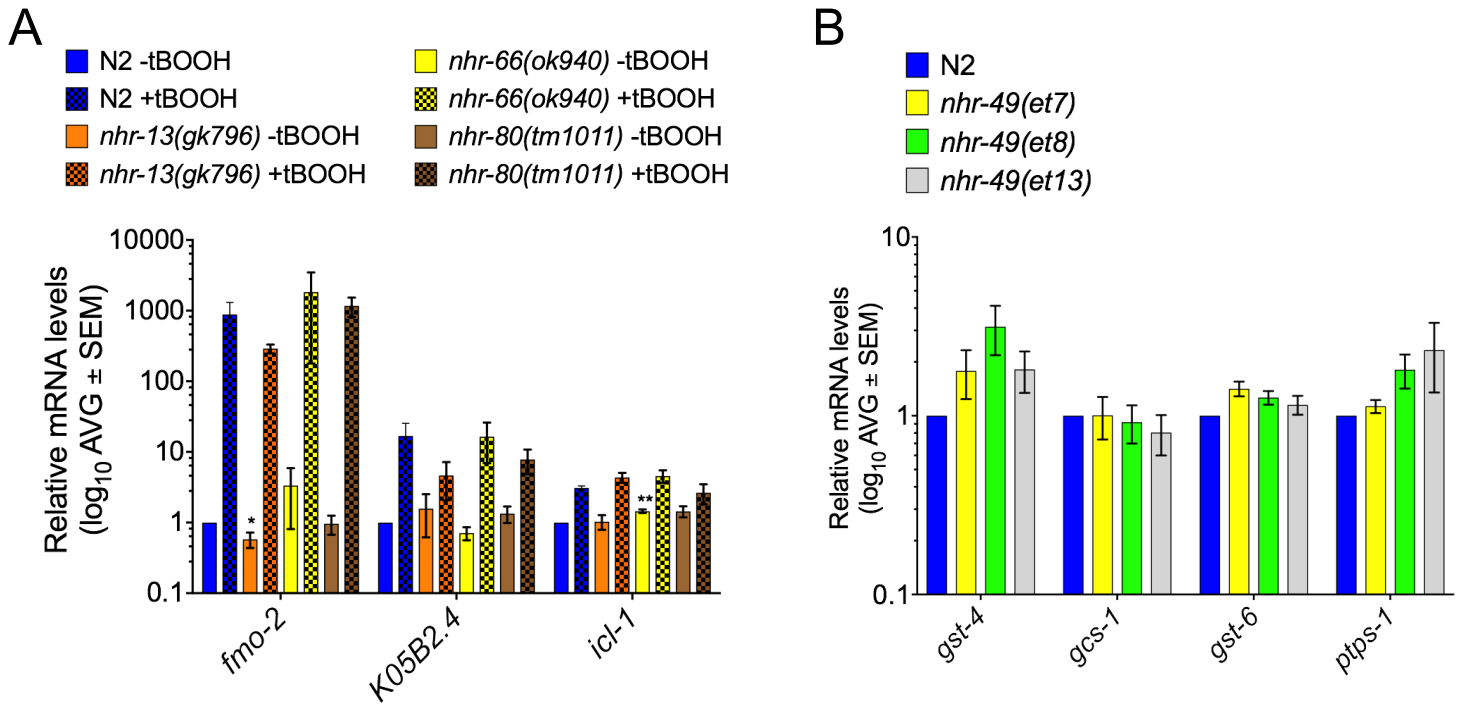

**Fig. S2. Regulation of stress response genes by NHR-49 and its NHR partners.**

**[A]** Fold changes of mRNA levels (relative to N2 untreated worms) in L4 stage N2, *nhr-13(gk796)*, *nhr-66(ok940)*, and *nhr-80(tm1011)* worms treated with 7.5 mM tBOOH for 4 hours ( $n \geq 3$ ). Error bars represent SEM. Gene expression levels differ significantly from N2 untreated worms:  $*=p < 0.05$  and  $**=p < 0.01$  (as determined by Student's t-test).

**[B]** mRNA fold changes (relative to untreated N2 worms) of arsenite-responsive genes in N2 and *nhr-49* GOF mutants ( $n=3$ ). No significant differences in expression were identified (as determined by Student's t-test).

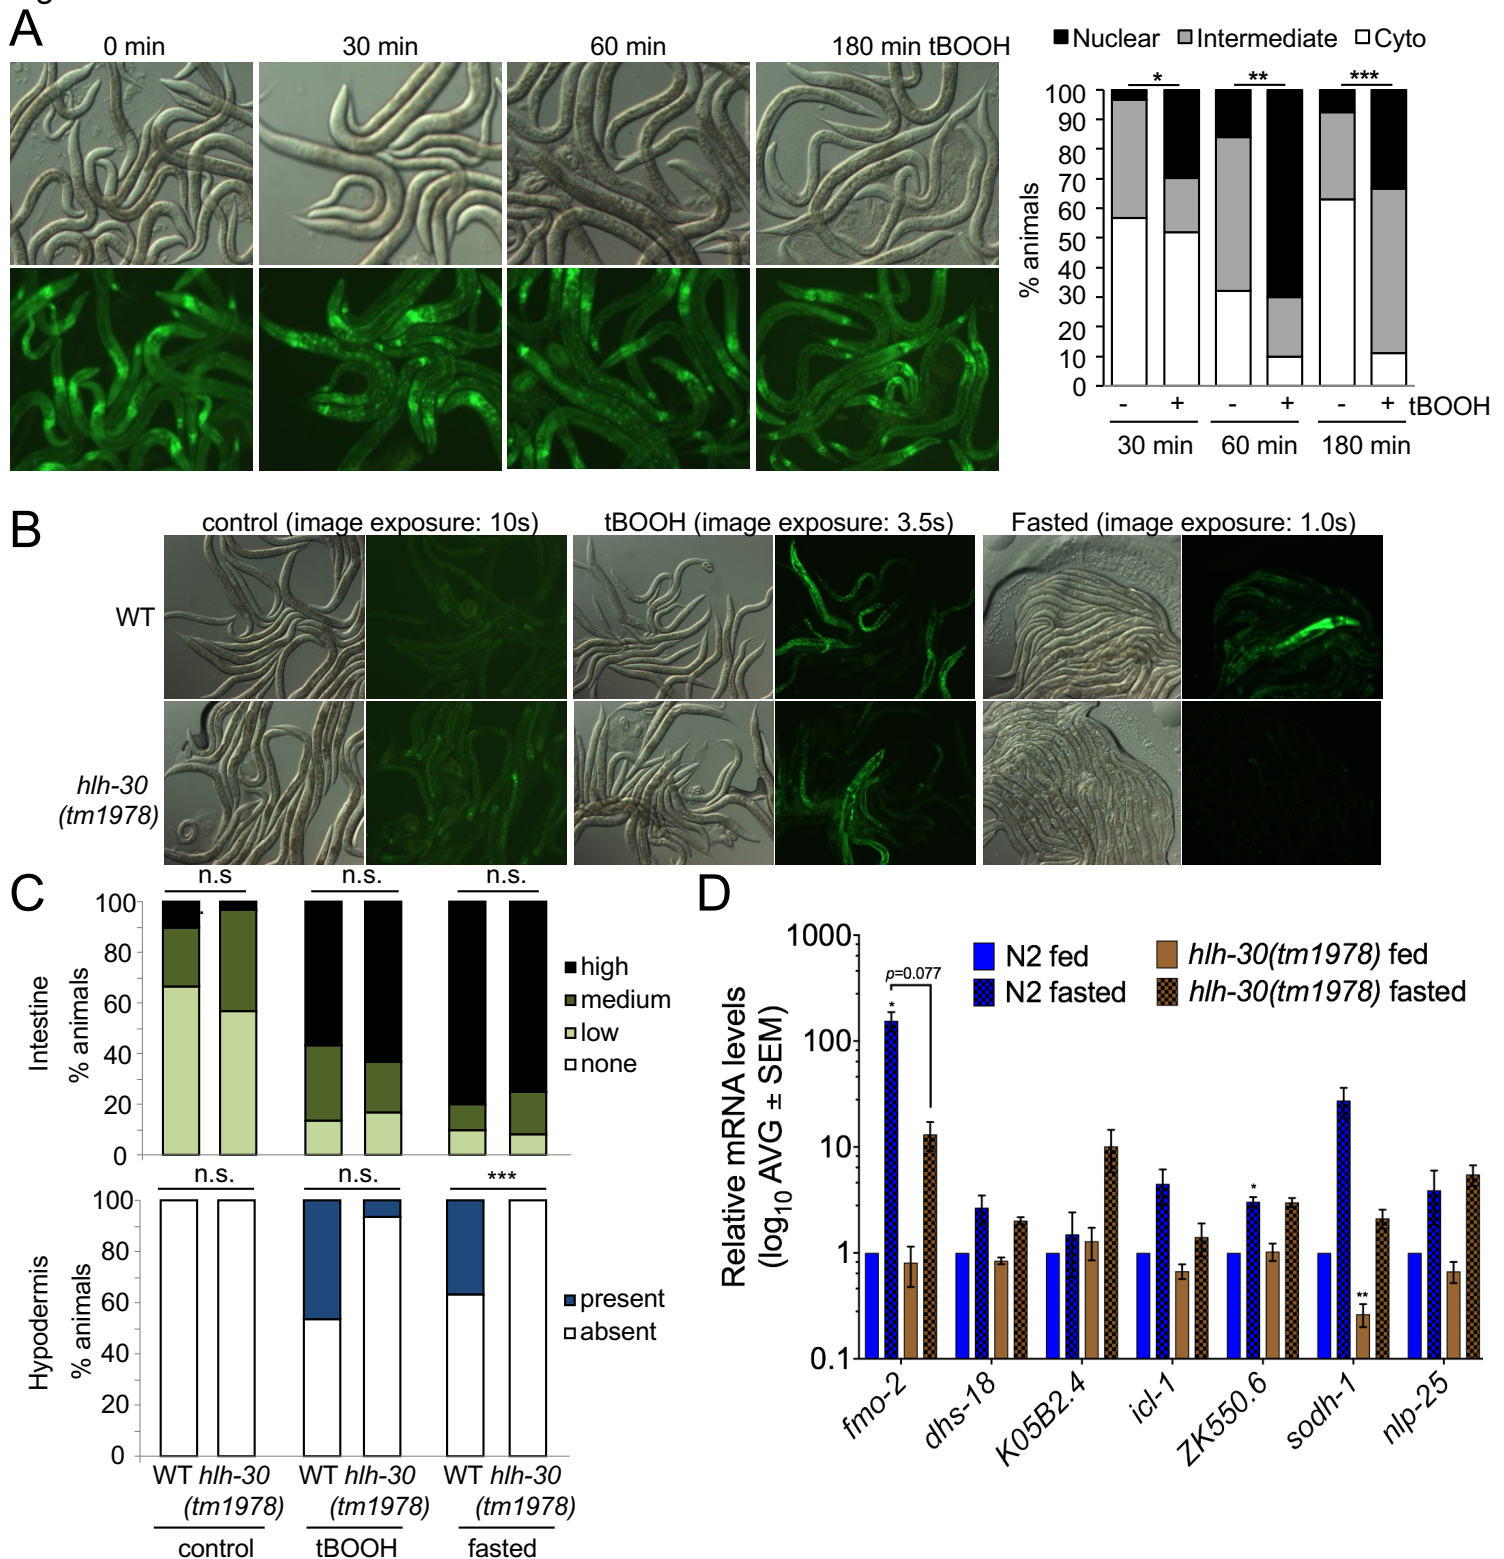

**Fig. S3. Regulation of HLH-30 by stress, and requirements of *hlh-30* in stress-induced transcription.** [A] Left: HLH-30::GFP localization after exposure to 10mM tBOOH for indicated times. Right: Quantification; cyto = cytoplasmic. Statistically significant differences between groups of 25-30 tBOOH-exposed and control animals are indicated: \* $p < 0.05$ , \*\* $p < 0.005$ , and \*\*\* $p < 0.0005$  (Chi-squared test).

[B] Imaging and [C] quantification of expression of *fmo-2p::gfp* in control, 10mM tBOOH (3h), and fasted (12h) *fmo-2p::gfp* and *hlh-30(tm1978)*; *fmo-2p::gfp* worms. In [C], intestinal and hypodermal fluorescence of *fmo-2p::GFP* in wild-type and *hlh-30(tm1978)* backgrounds were quantified for groups of 24-30 animals and analyzed as in Figure S1B.

[D] Fold changes in mRNA levels (vs. untreated N2 wild-type) in L4 N2 and *hlh-30(tm1978)* worms fasted for 8 hours ( $n=3$ ). \* $p < 0.05$  and \*\* $p < 0.01$ , compared to wild-type fed worms, as determined by unpaired Student's t-test.

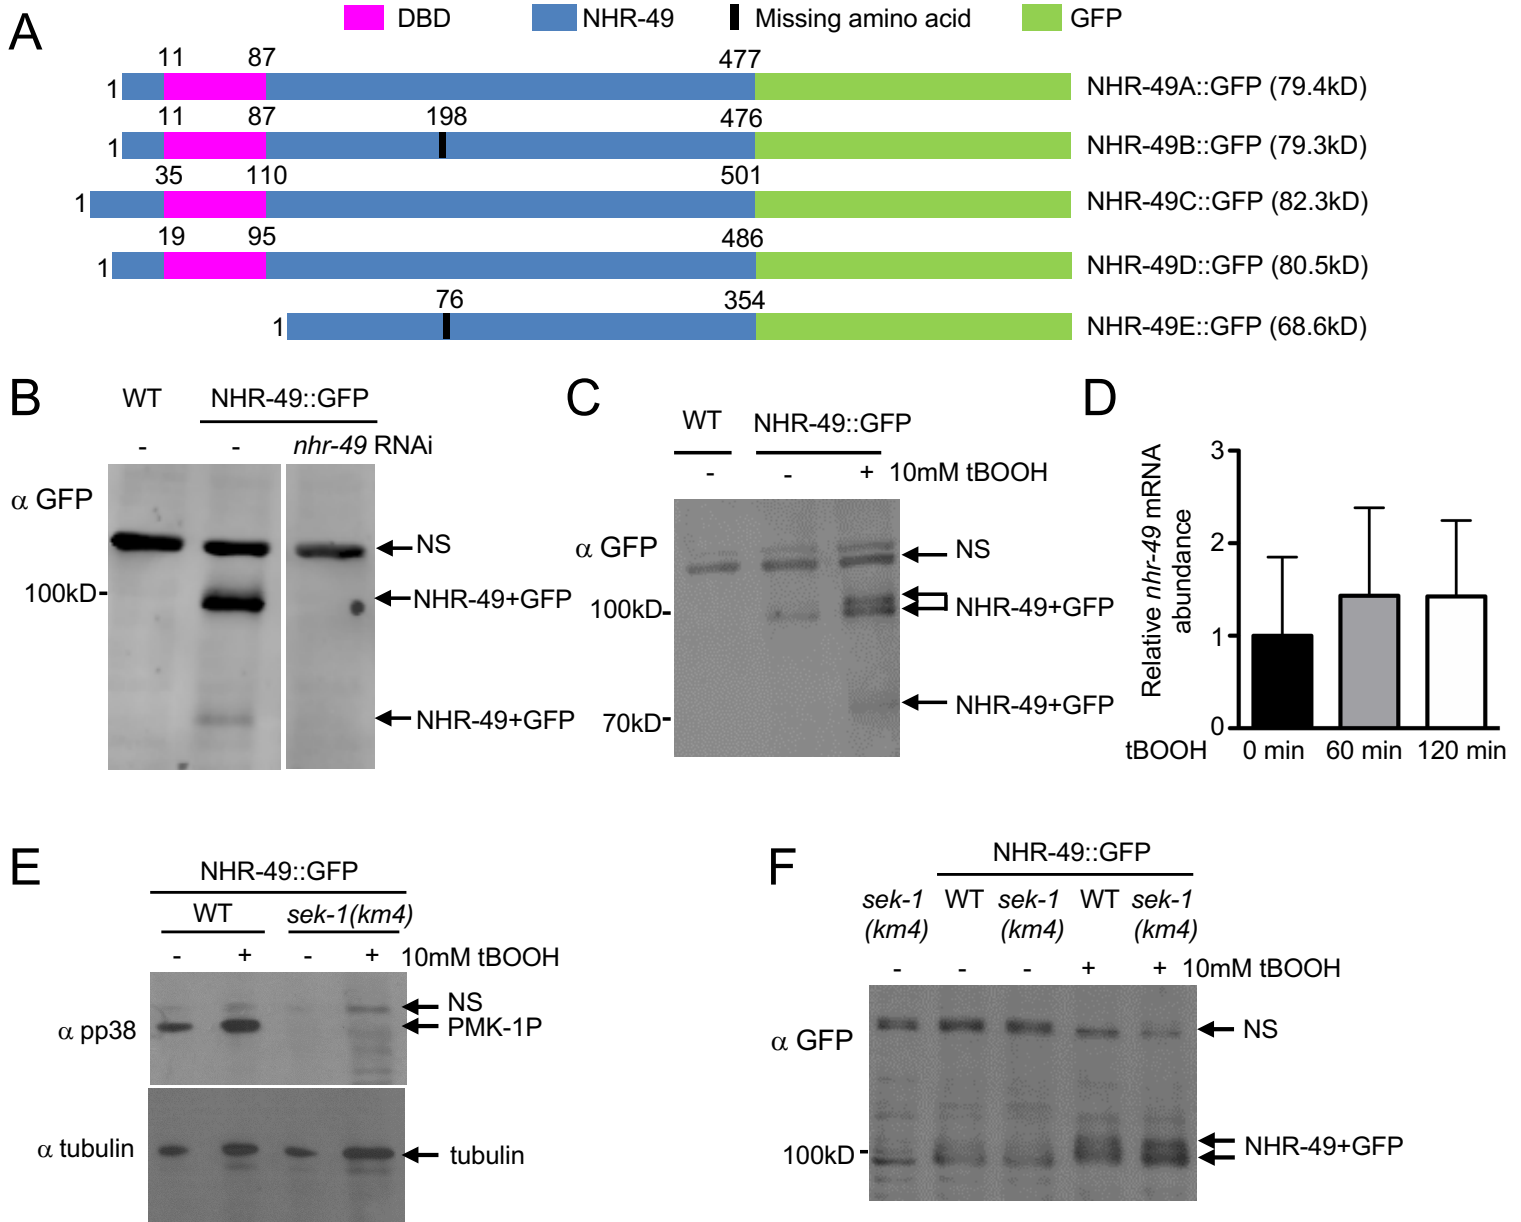

**Fig. S4. NHR-49 isoforms and regulation of NHR-49 levels by tBOOH and *sek-1*.**

**[A]** The *Pnhr-49::nhr-49::gfp* transgene is predicted to express all five NHR-49 isoforms (blue) as GFP fusions. The predicted MW of each isoform was calculated based on annotation in WormBase (WS258) plus the MW of GFP (27kD; green). The DNA binding domain (DBD; pink) is indicated; note, that NHR-49E encodes an isoform missing the DBD. 'Missing amino acid' indicates a residue not included in NHR-49B and NHR-49E.

**[B-C]** Anti-GFP immunoblot detects two NHR-49::GFP bands with apparent MWs of ~70 and ~100 kDa that are absent in non-transgenic worms [B], reduced by *nhr-49* RNAi [B], and induced by 1h treatment with 10mM tBOOH [C]. Non-specific bands (NS) show equal protein loading.

**[D]** Normalized *nhr-49* transcript abundance before and after exposure to 10mM tBOOH (n=3). Transcript levels are not significantly changed by exposure to tBOOH (determined by unpaired Student's t-test).

**[E]** Western blot analysis of levels of phosphorylated PMK-1 (PMK-1P) in wild-type (WT) and *sek-1(km4)* mutant worms expressing the *Pnhr-49::nhr-49::gfp* extrachromosomal array before and after 10min exposure to 10mM tBOOH. Non-specific bands (NS) are indicated. Tubulin levels are indicated as a loading control.

**[F]** Western blot analysis of levels of NHR-49::GFP in wild-type (WT) and *sek-1(km4)* worms expressing the *Pnhr-49::nhr-49::gfp* extrachromosomal array before and after 1h exposure to 10mM tBOOH, as indicated. Non-specific bands (NS) indicate equal protein loading.

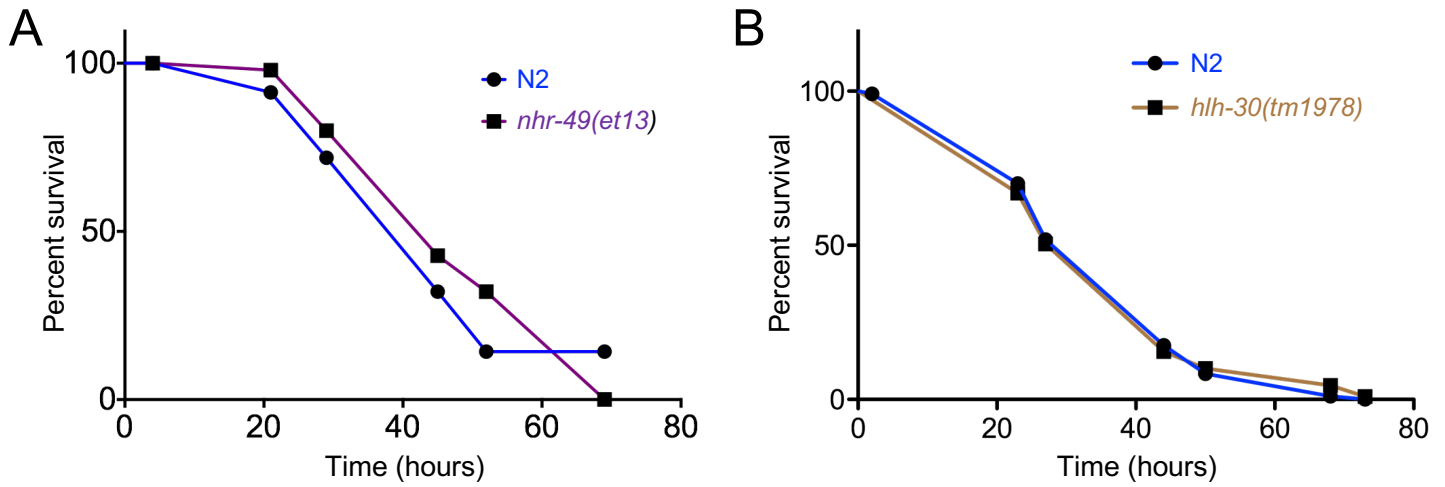

**Fig. S5. Oxidative stress resistance phenotypes of *nhr-49(et13)* and *hlh-30(tm1978)* mutants.**

**[A]** Survival plots of wild-type N2 and *nhr-49(et13)* worms on 6 mM tBOOH. Table S8 (Supporting information) shows statistics and replicates.

**[B]** Survival plots of wild-type N2 and *hlh-30(tm1978)* worms on 6 mM tBOOH. Table S10 (Supporting information) shows statistics and replicates.
