# Supplementary material for: NHR‐49/HNF4 integrates regulation of fatty acid metabolism with a protective transcriptional response to oxidative stress and fasting
Source: PubMed Central journal article supplement (PMC5946062; doi:10.1111/acel.12743), 2018-03-05
Supplement: ACEL-17-e12743-s002.pdf [file ACEL-17-e12743-s002.pdf]

SUPPLEMENTAL TABLES

Table S1. List of transcription factor candidates that bind MDT-15 and were tested in the RNAi screen, and screen results.

| RNAi           | Ref. for physical binding to MDT-15 | Repeat 1 |       | Repeat 2 |       | Repeat 3 |       | Verified using mounted images |       | Comments                 |
|----------------|-------------------------------------|----------|-------|----------|-------|----------|-------|-------------------------------|-------|--------------------------|
|                |                                     | Control  | tBOOH | Control  | tBOOH | Control  | tBOOH | Control                       | tBOOH |                          |
| L4440          |                                     | -        | +     | -        | +     | -        | +     | -                             | +     | Neg. control             |
| <i>mdt-15</i>  |                                     | -        | -     | -        | -     | -        | -     | -                             | -     | Pos. control             |
| <i>skn-1</i>   | (Goh et al. 2014)                   | -        | ++    | -        | ++    | -        | +     | -                             | ++    |                          |
| <i>nhr-4</i>   | (Reece-Hoyes et al. 2013)           | -        | +     | -        | +     | -        | +     |                               |       |                          |
| <i>nhr-8</i>   | (Arda et al. 2010)                  | -        | +     | -        | +     | -        | +     |                               |       |                          |
| <i>nhr-10</i>  | (Arda et al. 2010)                  | -        | +     | -        | +     | -        | +     |                               |       |                          |
| <i>nhr-12</i>  | (Arda et al. 2010)                  | +        | +     | +        | +     | -        | +     |                               |       |                          |
| <i>nhr-28</i>  | (Arda et al. 2010)                  |          |       |          |       | -        | +     |                               |       |                          |
| <i>nhr-49</i>  | (Taubert et al. 2006)               | -        | -     | -        | -     | -        | -     | -                             | -     | No fluorescence          |
| <i>nhr-64</i>  | (Taubert et al. 2006)               | -        | +     | -        | +     | -        | +     |                               |       |                          |
| <i>nhr-69</i>  | (Arda et al. 2010)                  | -        | +     | -        | +     | -        | +     |                               |       |                          |
| <i>nhr-86</i>  | (Arda et al. 2010)                  | -        | -     | -        | +     | -        | +     |                               |       |                          |
| <i>nhr-97</i>  | ST unpubl.                          | -        | +     | -        | +     | -        | +     |                               |       |                          |
| <i>nhr-112</i> | (Arda et al. 2010)                  |          |       |          |       | -        | +     |                               |       |                          |
| <i>nhr-114</i> | (Arda et al. 2010)                  |          |       |          |       | +        | +     | +                             | +     | ↑ nucl. signal in -tBOOH |
| <i>nhr-138</i> | (Reece-Hoyes et al. 2013)           |          |       |          |       | -        | +     |                               |       |                          |
| <i>nhr-273</i> | (Arda et al. 2010)                  |          |       |          |       | -        | +     |                               |       |                          |
| <i>npax-2</i>  | (Arda et al. 2010)                  | -        | +     | -        | +     | -        | +     |                               |       |                          |
| <i>hlh-8</i>   | (Arda et al. 2010)                  | -        | -     | -        | +     | -        | +     |                               |       |                          |
| <i>ztf-2</i>   | (Arda et al. 2010)                  | -        | +     | -        | +     | -        | +     |                               |       |                          |
| <i>sbp-1</i>   | (Yang et al. 2006)                  |          |       | -        | +     | -        | +     | -                             | +     |                          |

Synchronized L1 stage worms were transferred to RNAi plates, allowed to grow to the young adult stage, and scored for fluorescence (control condition). 10-15 transgenic worms (assessed by transgenic Roller marker) were then transferred to

NGM-lite plates containing 10 mM tBOOH, exposed for 3 hours, and scored for fluorescence (tBOOH condition). Fluorescence was assessed using a Leica M205 FA fluorescence stereo microscope, and scored manually as low (-), high (+), or very high (++). For some RNAi clones, images were acquired using mounted worms and an inverted microscope.

**Table S2. List of transcription factor candidates that bind the *fmo-2* promoter (according to modENCODE ChIP-seq data) and were tested in the RNAi screen, and screen results.**

| RNAi          | Control   |            | 10mM tBOOH<br>(3 hrs) |            | Fasted<br>(12 hrs) |            |
|---------------|-----------|------------|-----------------------|------------|--------------------|------------|
|               | Intestine | Hypodermis | Intestine             | Hypodermis | Intestine          | Hypodermis |
| <i>alr-1</i>  | -         | -          | -                     | -          | -                  | -          |
| <i>mdl-1</i>  | ↑↑        | -          | -                     | ↓          | -                  | ↓          |
| <i>pqm-1</i>  | --        | -          | -                     | -          | -                  | -          |
| <i>pha-4</i>  | ↑↑↑       | --         | ---                   | --         | -                  | -          |
| <i>eor-1</i>  | ↓-        | -          | -                     | ↓          | -                  | -          |
| <i>blmp-1</i> | ↑--       | ↓--        | ↓--                   | ↓--        | ---                | ---        |
| <i>elt-3</i>  | ↑-        | --         | --                    | ↓-         | ↓-                 | ↓-         |

In each experiment, 30 or more animals per treatment group were assessed; arrows and dashes indicate whether GFP signals were significantly increased (↑), decreased (↓), or unchanged (-) by treatment with the indicated RNAi compared negative control (L4440). Chi-squared distribution tests were used to determine whether differences between negative control (L4440) treated and transcription factor RNAi groups were statistically significant, i.e.  $p < 0.05$ .
