# Supplementary material for: NHR‐49/HNF4 integrates regulation of fatty acid metabolism with a protective transcriptional response to oxidative stress and fasting
Source: PubMed Central journal article supplement (PMC5946062; doi:10.1111/acel.12743), 2018-03-05
Supplement: ACEL-17-e12743-s005.pdf [file ACEL-17-e12743-s005.pdf]

**Table S5: Overlaps between genes induced by tBOOH, starvation, or in *glp-1(bn18)* mutants.**

| Overlaps between gene sets                                                | 250 tBOOH-induced genes (RNA-seq, this study.)              |
|---------------------------------------------------------------------------|-------------------------------------------------------------|
| 329 fasting-induced genes (Uno et al. 2013)                               | Overlap: 44 genes<br>p-value < 2.2e-16<br>Odds ratio: 13.57 |
| 1306 genes induced in <i>glp-1(bn18)</i> mutants (Steinbaugh et al. 2015) | Overlap: 61 genes<br>p-value < 2.2e-16<br>Odds ratio: 4.73  |
| 221 genes induced by tBOOH, SKN-1 independent (Oliveira et al. 2009)      | Overlap: 53 genes<br>p-value < 2.2e-16<br>Odds ratio: 29.14 |

**Table S6: Oxidative stress (6 mM tBOOH) response of *C. elegans nhr-49* and *fmo-2* null mutants.**

| Strain                | Experiment no. | Median survival (hours) | Number of subjects (Dx/Nx (Cx)) | p value vs. wild type |
|-----------------------|----------------|-------------------------|---------------------------------|-----------------------|
| N2                    | 1              | 26                      | 67/112 (45)                     | NA                    |
|                       | 2              | 41                      | 41/118 (77)                     | NA                    |
|                       | 3              | 52                      | 48/107 (59)                     | NA                    |
|                       | 4              | 30                      | 76/129 (53)                     | NA                    |
| <i>nhr-49(nr2041)</i> | 1              | 20                      | 79/92 (13)                      | 0.0016**              |
|                       | 2              | 27.5                    | 34/44 (10)                      | <0.001***             |
|                       | 3              | Not determined          |                                 |                       |
|                       | 4              | Not determined          |                                 |                       |
| <i>fmo-2(ok2147)</i>  | 1              | 43                      | 76/110 (34)                     | 0.0015**              |
|                       | 2              | 51.5                    | 32/66 (34)                      | 0.0849                |
|                       | 3              | 69                      | 36/113 (77)                     | 0.0027**              |
|                       | 4              | 30                      | 61/129 (68)                     | 0.0363*               |

Number of subjects is denoted as follows: Dx=Number of deaths that occurred during the assay; Nx=Total number of animals used in assay; Cx=Number of censored events (i.e. worms that ruptured at the vulva, underwent internal hatching of the progeny, or crawled off the plate). All p-values are derived using the log-rank (Mantel-Cox) test. \*p<0.05, \*\*p<0.01, and \*\*\*p<0.001. NA=not applicable.

**Table S7: Oxidative stress (6 mM tBOOH) response of *C. elegans Pnhr-49::nhr-49::gfp* worms and non-transgenic siblings.**

| Strain                      | Experiment no. | Median survival (hours) | Number of subjects (Dx/Nx (Cx)) | p value vs. non-transgenic siblings |
|-----------------------------|----------------|-------------------------|---------------------------------|-------------------------------------|
| Non-transgenic siblings     | 1              | 45                      | 87/106(19)                      | NA                                  |
|                             | 2              | 26                      | 101/115(4)                      | NA                                  |
|                             | 3              | 46                      | 92/107(15)                      | NA                                  |
|                             | 4              | 45                      | 91/102(10)                      | NA                                  |
| <i>nhr-49p::nhr-49::gfp</i> | 1              | 52                      | 66/104(32)                      | 0.0015**                            |
|                             | 2              | 44                      | 89/116(3)                       | 0.0015**                            |
|                             | 3              | 28                      | 90/110(18)                      | 0.0653                              |
|                             | 4              | 45                      | 95/105(9)                       | 0.0567                              |

Number of subjects is denoted as follows: Dx=Number of deaths that occurred during the assay; Nx=Total number of animals used in assay; Cx=Number of censored events (i.e. worms that ruptured at the vulva, underwent internal hatching of the progeny, or crawled off the plate). All p-values are derived using the log-rank (Mantel-Cox) test. \*\*p<0.01. NA=not applicable. Cox's regression analysis of all four datasets indicated that there was a statistically significant difference between *nhr-49p::nhr-49::gfp* and non-transgenic siblings: p=0.036.

**Table S8: Oxidative stress (6 mM tBOOH) response of *C. elegans nhr-49(et13)* *gof* mutants.**

| Strain | Experiment no. | Median survival (hours) | Number of subjects (Dx/Nx (Cx)) | p value vs. wild type |
|--------|----------------|-------------------------|---------------------------------|-----------------------|
|--------|----------------|-------------------------|---------------------------------|-----------------------|

|                     |   |    |             |           |
|---------------------|---|----|-------------|-----------|
| N2                  | 1 | 45 | 81/118(37)  | NA        |
|                     | 2 | 45 | 66/120(54)  | NA        |
|                     | 3 | 47 | 66/116(50)  | NA        |
|                     | 4 | 30 | 76/129 (53) | NA        |
| <i>nhr-49(et13)</i> | 1 | 45 | 54/119(65)  | 0.0492*   |
|                     | 2 | 52 | 39/136(97)  | 0.1352    |
|                     | 3 | 67 | 29/121(92)  | 0.0002*** |
|                     | 4 | 30 | 69/125 (56) | 0.0007*** |

Number of subjects is denoted as follows: Dx=Number of deaths that occurred during the assay; Nx=Total number of animals used in assay; Cx=Number of censored events (i.e. worms that ruptured at the vulva, underwent internal hatching of the progeny, or crawled off the plate). All *p*-values are derived using the log-rank (Mantel-Cox) test. \**p*<0.05, and \*\*\**p*<0.001. NA=not applicable. Cox's regression analysis of all four datasets indicated that there was a statistically significant difference between N2 and *nhr-49(et13)*: *p*<0.001.

**Table S9: Oxidative stress (6 mM tBOOH) response of *C. elegans nhr-49, glp-1, and glp-1; nhr-49* mutants.**

| Strain                              | Experiment no. | Median survival (hours) | Number of subjects (Dx/Nx (Cx)) | <i>p</i> value vs. wild type | <i>p</i> value vs. <i>glp-1(e2141)</i> |
|-------------------------------------|----------------|-------------------------|---------------------------------|------------------------------|----------------------------------------|
| N2                                  | 1              | 23                      | 57/116 (59)                     | NA                           | NA                                     |
|                                     | 2              | 21                      | 107/131 (24)                    | NA                           | NA                                     |
|                                     | 3              | 30                      | 65/90 (25)                      | NA                           | NA                                     |
|                                     | 4              | 33                      | 63/76 (13)                      | NA                           | NA                                     |
| <i>glp-1(e2141)</i>                 | 1              | 74                      | 87/115 (28)                     | <0.0001****                  | NA                                     |
|                                     | 2              | 69                      | 84/104 (20)                     | <0.0001****                  | NA                                     |
|                                     | 3              | 46                      | 72/98 (26)                      | <0.0001****                  | NA                                     |
|                                     | 4              | 46                      | 85/113 (28)                     | <0.0001****                  | NA                                     |
| <i>nhr-49(nr2041)</i>               | 1              | Not determined          |                                 |                              |                                        |
|                                     | 2              | Not determined          |                                 |                              |                                        |
|                                     | 3              | 23                      | 60/76 (16)                      | <0.0001****                  | NA                                     |
|                                     | 4              | 23                      | 95/109 (14)                     | <0.0001****                  | NA                                     |
| <i>glp-1(e2141); nhr-49(nr2041)</i> | 1              | 30                      | 62/63 (1)                       | 0.0123*                      | <0.0001****                            |
|                                     | 2              | 27                      | 64/66 (2)                       | <0.0001****                  | <0.0001****                            |
|                                     | 3              | 23                      | 36/50 (14)                      | 0.0101*                      | <0.0001****                            |
|                                     | 4              | 23                      | 67/80 (13)                      | <0.0001****                  | <0.0001****                            |

Number of subjects is denoted as follows: Dx=Number of deaths that occurred during the assay; Nx=Total number of animals used in assay; Cx=Number of censored events (i.e. worms that ruptured at the vulva, underwent internal hatching of the progeny, or crawled off the plate). All *p*-values are derived using the log-rank (Mantel-Cox) test. \**p*<0.05, and \*\*\**p*<0.0001. NA=not applicable.

**Table S10: Oxidative stress (6 mM tBOOH) response of *C. elegans* wild-type worms grown on RNAi clones targeting NHR-49 regulated genes.**

| RNAi clone      | Experiment no. | Median survival (hours) | Number of subjects (Dx/Nx (Cx)) | <i>p</i> value vs. control |
|-----------------|----------------|-------------------------|---------------------------------|----------------------------|
| control (L4440) | 1              | 20                      | 57/83(25)                       | NA                         |
|                 | 2              | 24                      | 54/81(32)                       | NA                         |
|                 | 3              | 19                      | 66/90(24)                       | NA                         |
| K05B2.4         | 1              | 20                      | 67/74(7)                        | < 0.0001****               |
|                 | 2              | 20                      | 70/84(7)                        | < 0.0001****               |
|                 | 3              | 19                      | 62/81(19)                       | < 0.0001****               |
| ZK550.6         | 1              | 28                      | 49/71(21)                       | 0.0036*                    |
|                 | 2              | 20                      | 60/81(30)                       | 0.1735                     |
|                 | 3              | Undefined               | 17/74(55)                       | < 0.0001****               |
| <i>nlp-25</i>   | 1              | 28                      | 48/97(47)                       | < 0.0001****               |
|                 | 2              | 20                      | 51/70(19)                       | 0.049*                     |
|                 | 3              | 19                      | 67/83(13)                       | 0.1737                     |

|               |   |    |            |              |
|---------------|---|----|------------|--------------|
| <i>dhs-18</i> | 1 | 28 | 44/100(55) | < 0.0001**** |
|               | 2 | 20 | 54/93(35)  | 0.7438       |
|               | 3 | 19 | 60/80(22)  | 0.7322       |
| <i>icl-1</i>  | 1 | 28 | 37/102(63) | < 0.0001**** |
|               | 2 | 20 | 60/88(24)  | 0.2671       |
|               | 3 | 42 | 33/73(45)  | < 0.0001**** |
| <i>sodh-1</i> | 1 | 20 | 59/81(19)  | < 0.0001**** |
|               | 2 | 20 | 61/70(8)   | < 0.0001**** |
|               | 3 | 19 | 57/72(15)  | < 0.0001**** |

Number of subjects is denoted as follows: Dx=Number of deaths that occurred during the assay; Nx=Total number of animals used in assay; Cx=Number of censored events (i.e. worms that ruptured at the vulva, underwent internal hatching of the progeny, or crawled off the plate). All *p*-values are derived using the log-rank (Mantel-Cox) test. \**p*<0.05, and \*\*\*\**p*<0.0001. NA=not applicable.

**Table S11: Oxidative stress (6 mM tBOOH) response of *C. elegans glp-1* mutants grown on RNAi clones targeting NHR-49 regulated genes.**

| RNAi clone      | Experiment no. | Median survival (hours) | Number of subjects (Dx/Nx (Cx)) | <i>p</i> value vs. control |
|-----------------|----------------|-------------------------|---------------------------------|----------------------------|
| control (L4440) | 1              | 74                      | 61/97(34)                       | N/A                        |
|                 | 2              | 55                      | 39/70(29)                       | N/A                        |
|                 | 3              | 42                      | 94/111(22)                      | N/A                        |
| K05B2.4         | 1              | 28                      | 81/104(13)                      | < 0.0001****               |
|                 | 2              | 47                      | 78/102(26)                      | 0.0125*                    |
|                 | 3              | 19                      | 75/103(27)                      | < 0.0001****               |
| ZK550.6         | 1              | 47                      | 58/74(18)                       | 0.2017                     |
|                 | 2              | 47                      | 56/87(32)                       | 0.9293                     |
|                 | 3              | 42                      | 50/63(13)                       | 0.4061                     |
| <i>nlp-25</i>   | 1              | 74                      | 66/99(30)                       | 0.2711                     |
|                 | 2              | 55                      | 67/97(35)                       | 0.1879                     |
|                 | 3              | 42                      | 83/95(16)                       | 0.0669                     |
| <i>dhs-18</i>   | 1              | 47                      | 84/103(21)                      | < 0.0001****               |
|                 | 2              | 74                      | 73/88(22)                       | 0.6203                     |
|                 | 3              | 49                      | 76/106(32)                      | 0.0819                     |
| <i>icl-1</i>    | 1              | 74                      | 52/99(50)                       | 0.3797                     |
|                 | 2              | 55                      | 56/93(31)                       | 0.9686                     |
|                 | 3              | 27                      | 68/103(34)                      | 0.0052**                   |
| <i>sodh-1</i>   | 1              | 28                      | 89/97(9)                        | < 0.0001****               |
|                 | 2              | 47                      | 67/91(28)                       | < 0.0001****               |
|                 | 3              | 27                      | 102/107(6)                      | < 0.0001****               |

Number of subjects is denoted as follows: Dx=Number of deaths that occurred during the assay; Nx=Total number of animals used in assay; Cx=Number of censored events (i.e. worms that ruptured at the vulva, underwent internal hatching of the progeny, or crawled off the plate). All *p*-values are derived using the log-rank (Mantel-Cox) test. \**p*<0.05, \*\**p*<0.01, and \*\*\*\**p*<0.0001. NA=not applicable.

**Table S12: Oxidative stress (6 mM tBOOH) response of *C. elegans hlh-30* mutants.**

| Strain                | Experiment no. | Median survival (hours) | Number of subjects (Dx/Nx (Cx)) | <i>p</i> value vs. wild type |
|-----------------------|----------------|-------------------------|---------------------------------|------------------------------|
| N2                    | 1              | 45                      | 84/112(28)                      | NA                           |
|                       | 2              | 46                      | 83/94(2)                        | NA                           |
|                       | 3              | 44                      | 111/120(9)                      | NA                           |
| <i>hlh-30(tm1978)</i> | 1              | 45                      | 92/117(20)                      | 0.8488                       |
|                       | 2              | 46                      | 88/94(2)                        | 0.3601                       |
|                       | 3              | 44                      | 112/120(8)                      | 0.8238                       |

Number of subjects is denoted as follows: Dx=Number of deaths that occurred during the assay; Nx=Total number of animals used in assay; Cx=Number of censored events (i.e. worms that ruptured at the vulva, underwent internal hatching of the progeny, or crawled off the plate). All *p*-values are derived using the log-rank (Mantel-Cox) test. NA=not applicable.

**Table S13. Worm strains used in this study.**

| Strain  | Genotype                                                                                   | Reference                 |
|---------|--------------------------------------------------------------------------------------------|---------------------------|
| N2      | Wild type                                                                                  | (Brenner 1974)            |
| STE68   | <i>nhr-49(nr2041) I</i>                                                                    | (Van Gilst et al. 2005)   |
| VE40    | <i>N2 eavEx20[fmo-2p::gfp + rol-6(su1006)]</i>                                             | This study                |
| STE108  | <i>nhr-49(et7) I</i>                                                                       | (Lee et al. 2016)         |
| STE109  | <i>nhr-49(et8) I</i>                                                                       | (Lee et al. 2016)         |
| STE110  | <i>nhr-49(et13) I</i>                                                                      | (Lee et al. 2016)         |
| STE117  | <i>nhr-49(et13) I; eavEx20[fmo-2p::gfp + rol-6(su1006)]</i>                                | This study                |
| STE71   | <i>nhr-13(gk796) V</i>                                                                     | (Pathare et al. 2012)     |
| STE69   | <i>nhr-66(ok940) IV</i>                                                                    | (Pathare et al. 2012)     |
| STE70   | <i>nhr-80(tm1011) III</i>                                                                  | (Goudeau et al. 2011)     |
| VC1668  | <i>fmo-2(ok2147) IV</i>                                                                    | (Leiser et al. 2015)      |
| JIN1375 | <i>hlh-30(tm1978) IV</i>                                                                   | (Lapierre et al. 2013)    |
| VE41    | <i>hlh-30(tm1978) IV; eavEx20[fmo-2p::gfp + rol-6(su1006)]</i>                             | This study                |
| MAH235  | <i>sqIs19[hlh-30p::hlh-30::gfp, rol-6(su1006)]</i>                                         | (Lapierre et al. 2013)    |
| STE119  | <i>sqIs19[hlh-30p::hlh-30::gfp, rol-6(su1006)]; nhr-49(nr2041) I</i>                       | This study                |
| STE118  | <i>nhr-49(et13) I; hlh-30(tm1978) IV</i>                                                   | This study                |
| KAE9    | <i>seaSi39 [(pCFJ448) (eft-3p::fmo-2 + H2B::GFP) + Cbr-unc-119(+)] I; unc-119(ed3) III</i> | (Leiser et al. 2015)      |
| CF1903  | <i>glp-1(e2141ts) III</i>                                                                  | (Arantes-Oliveira 2002)   |
| AGP22   | <i>nhr-49(nr2041) I; glp-1(e2141ts) III</i>                                                | (Ratnappan et al. 2014)   |
| VE42    | <i>sek-1(km4); eavEx20[(fmo-2p::gfp + rol-6(su1006)]</i>                                   | This study                |
| AGP24f  | <i>glmEx5 (Pnhr-49::nhr-49::GFP + Pmyo-2::mCherry)</i>                                     | (Ratnappan et al. 2014)   |
| KU4     | <i>sek-1(km4) X</i>                                                                        | (Tanaka-Hino et al. 2002) |
| VE43    | <i>sek-1(km4) X; glmEx5[Pnhr-49::nhr-49::GFP + Pmyo-2::mCherry]</i>                        | This study                |
| KU25    | <i>pmk-1(km25) IV</i>                                                                      | (Mizuno et al. 2004)      |

**Table S14. List of non-Ahringer library RNAi clones used in this study.**

| Clone          | Source                                                                                                      |
|----------------|-------------------------------------------------------------------------------------------------------------|
| <i>nhr-28</i>  | Custom made<br>Forward primer: GCTAGCgcggtgacaatatattccatgtt<br>Reverse primer: CCCGGGcCTCACTGCTTCGTTCCGGAC |
| <i>nhr-12</i>  | Vidal library, Plate 70 Well C03                                                                            |
| <i>nhr-86</i>  | (Arda et al. 2010)                                                                                          |
| <i>nhr-112</i> | Custom made<br>Forward primer: GCTAGCGAGGACAGGGATAGAgtagg<br>Reverse primer: AAGCTTGATATGTTTGAGTAGCctgg     |
| <i>nhr-114</i> | Custom made<br>Forward primer: GCTAGCgttcagCTATCCGCTGTGCCTGC<br>Reverse primer: AAGCTTGAGTCCGGCTGGCctataacg |
| <i>nhr-138</i> | Custom made<br>Forward primer: GCTAGCGGCAACGAGGACAAAGgtagg                                                  |

| Clone          | Source                                                                                                   |
|----------------|----------------------------------------------------------------------------------------------------------|
|                | Reverse primer: CCCGGGgttacCTGTACAGAAGTAAGC                                                              |
| <i>nhr-273</i> | Custom made<br>Forward primer: GCTAGCGCCGATTGATCAGAAAgtagg<br>Reverse primer: AAGCTTCGGACGGCGCATACAAGTTG |

**Table S15. List of qPCR primer sequences used in this study.**

| Gene           | Forward primer (5'-3')           | Reverse primer (5'-3')         |
|----------------|----------------------------------|--------------------------------|
| <i>fmo-2</i>   | GGAACAAGCGTGTGCTGT               | GCCATAGAGAAGACCATGTCCG         |
| <i>dhs-18</i>  | CATCCAAAACCTACCGGGAAC            | TTTACTGCTGCCTCATCACG           |
| <i>K05B2.4</i> | CCCTATACGAATGACAGGATTG           | TGTTTGAACCTTGTGGTGAG           |
| <i>icl-1</i>   | ATTGCTTCGAGTTGATGAAGG            | GATCCAAGCTGATCTTCGTAGTG        |
| <i>ZK550.6</i> | TTCCGGAGCCAATAGAACTG             | CGGGTCGAGACCATATCTTG           |
| <i>sodh-1</i>  | ATTGGTTGGAGGACACGAAG             | GCTCGTGGCCTTTCTTACAG           |
| <i>nlp-25</i>  | ATCACTAATTGCGCTTCTCC             | TCCTCCACCTCTGCCATAAC           |
| <i>nhr-49</i>  | TCCGAGTTCATTCTCGACG              | GGATGAATTGCCAATGGAGC           |
| <i>hlh-30</i>  | CTCATCGGCCGGCGCTCATC             | AGAACCGGATGCGTGGTGGG           |
| <i>mdt-15</i>  | GGAAATCCGTACAATCAGCAG            | CAAGAACTGATGAAGGACCG           |
| <i>act-1</i>   | GCTGGACGTGATCTTACTGATTAC<br>C    | GTAGCAGAGCTTCTCCTTGATGTC       |
| <i>tba-1</i>   | GTACACTCCACTGATCTCTGCTGA<br>CAAG | CTCTGTACAAGAGGCAAACAGCCAT<br>G |
| <i>ubc-2</i>   | AGGGAGGTGTCTTCTTCCTCAC           | CGGATTTGGATCACAGAGCAGC         |

## SUPPLEMENTAL REFERENCES

- Arantes-Oliveira N (2002) Regulation of Life-Span by Germ-Line Stem Cells in *Caenorhabditis elegans*. *Science* 295, 502–505.
- Arda HE, Taubert S, Macneil LT, Conine CC, Tsuda B, Van Gilst M, Sequerra R, Doucette-Stamm L, Yamamoto KR & Walhout AJM (2010) Functional modularity of nuclear hormone receptors in a *Caenorhabditis elegans* metabolic gene regulatory network. *Molecular Systems Biology* 6, 367.
- Brenner S (1974) The genetics of *Caenorhabditis elegans*. *Genetics* 77, 71–94.
- Goh GYS, Martelli KL, Parhar KS, Kwong AWL, Wong MA, Mah A, Hou NS & Taubert S (2014) The conserved Mediator subunit MDT-15 is required for oxidative stress responses in *Caenorhabditis elegans*. *Aging Cell* 13, 70–79.
- Goudeau J, Bellemin S, Toselli-Mollereau E, Shamalnasab M, Chen Y & Aguilaniu H (2011) Fatty Acid Desaturation Links Germ Cell Loss to Longevity Through NHR-80/HNF4 in *C. elegans*. *PLoS Biol* 9, e1000599.
- Lapierre LR, De Magalhaes Filho CD, McQuary PR, Chu C-C, Visvikis O, Chang JT, Gelino S, Ong B, Davis AE, Irazoqui JE, Dillin A & Hansen M (2013) The TFEB orthologue HLH-30 regulates autophagy and modulates longevity in *Caenorhabditis elegans*. *Nat Commun* 4, 2267.
- Lee K, Goh GYS, Wong MA, Klassen TL & Taubert S (2016) Gain-of-Function Alleles in *Caenorhabditis elegans* Nuclear Hormone Receptor *nhr-49* Are Functionally Distinct. *PLoS ONE* 11, e0162708.
- Leiser SF, Miller H, Rossner R, Fletcher M, Leonard A, Primitivo M, Rintala N, Ramos FJ, Miller DL & Kaeblerlein M (2015) Cell nonautonomous activation of flavin-containing monooxygenase promotes longevity and health span.

*Science* 350, 1375–1378.

- Mizuno T, Hisamoto N, Terada T, Kondo T, Adachi M, Nishida E, Kim DH, Ausubel FM & Matsumoto K (2004) The *Caenorhabditis elegans* MAPK phosphatase VHP-1 mediates a novel JNK-like signaling pathway in stress response. *EMBO J* 23, 2226–2234.
- Oliveira RP, Abate JP, Dilks K, Landis J, Ashraf J, Murphy CT & Blackwell TK (2009) Condition-adapted stress and longevity gene regulation by *Caenorhabditis elegans* SKN-1/Nrf. *Aging Cell* 8, 524–541.
- Pathare PP, Lin A, Bornfeldt KE, Taubert S & Van Gilst MR (2012) Coordinate Regulation of Lipid Metabolism by Novel Nuclear Receptor Partnerships K. Ashrafi, ed. *PLoS Genet* 8, e1002645.
- Ratnappan R, Amrit FRG, Chen S-W, Gill H, Holden K, Ward J, Yamamoto KR, Olsen CP & Ghazi A (2014) Germline Signals Deploy NHR-49 to Modulate Fatty-Acid  $\beta$ -Oxidation and Desaturation in Somatic Tissues of *C. elegans*. *PLoS Genet* 10, e1004829.
- Reece-Hoyes JS, Pons C, Diallo A, Mori A, Shrestha S, Kadreppa S, Nelson J, DiPrima S, Dricot A, Lajoie BR, Ribeiro PSM, Weirauch MT, Hill DE, Hughes TR, Myers CL & Walhout AJM (2013) Extensive rewiring and complex evolutionary dynamics in a *C. elegans* multiparameter transcription factor network. *Molecular Cell* 51, 116–127.
- Steinbaugh MJ, Narasimhan SD, Robida-Stubbs S, Moronetti Mazzeo LE, Dreyfuss JM, Hourihan JM, Raghavan P, Operaña TN, Esmailie R & Blackwell TK (2015) Lipid-mediated regulation of SKN-1/Nrf in response to germ cell absence. *elife* 4.
- Tanaka-Hino M, Sagasti A, Hisamoto N, Kawasaki M, Nakano S, Ninomiya-Tsuji J, Bargmann CI & Matsumoto K (2002) SEK-1 MAPKK mediates  $Ca^{2+}$  signaling to determine neuronal asymmetric development in *Caenorhabditis elegans*. *EMBO Rep* 3, 56–62.
- Taubert S, Van Gilst MR, Hansen M & Yamamoto KR (2006) A Mediator subunit, MDT-15, integrates regulation of fatty acid metabolism by NHR-49-dependent and -independent pathways in *C. elegans*. *Genes Dev* 20, 1137–1149.
- Uno M, Honjoh S, Matsuda M, Hoshikawa H, Kishimoto S, Yamamoto T, Ebisuya M, Yamamoto T, Matsumoto K & Nishida E (2013) A fasting-responsive signaling pathway that extends life span in *C. elegans*. *Cell Rep* 3, 79–91.
- Van Gilst MR, Hadjivassiliou H, Jolly A & Yamamoto KR (2005) Nuclear Hormone Receptor NHR-49 Controls Fat Consumption and Fatty Acid Composition in *C. elegans*. *PLoS Biol* 3, e53.
- Yang F, Vought BW, Satterlee JS, Walker AK, Jim Sun Z-Y, Watts JL, DeBeaumont R, Saito RM, Hyberts SG, Yang S, Macol C, Iyer L, Tjian R, van den Heuvel S, Hart AC, Wagner G & Näär AM (2006) An ARC/Mediator subunit required for SREBP control of cholesterol and lipid homeostasis. *Nature* 442, 700–704.
